# Supplementary material
Source: PubMed Central journal article supplement (PMC5554432)
Supplement: NIHMS884453-supplement-sup.pdf [file NIHMS884453-supplement-sup.pdf]

Supplementary Materials for  
**Combined antiangiogenic and anti-PD-L1 therapy stimulates tumor  
immunity through HEV formation**

Elizabeth Allen, Arnaud Jabouille, Lee B. Rivera, Inge Lodewijckx, Rindert Missiaen,  
Veronica Steri, Kevin Feyen, Jaime Tawney, Douglas Hanahan,  
Iacovos P. Michael, Gabriele Bergers\*

\*Corresponding author. Email: gabriele.bergers@kuleuven.vib.be

Published 12 April 2017, *Sci. Transl. Med.* **9**, eaak9679 (2017)  
DOI: 10.1126/scitranslmed.aak9679

**The PDF file includes:**

Materials and Methods

Fig. S1. Anti-VEGF therapy (B20S) does not prolong survival of NFpp10-GBM-bearing mice.

Fig. S2. PD-L1 up-regulation during antiangiogenic therapy correlates with tumor relapse.

Fig. S3. IFN $\gamma$  induces PD-L1 expression in several cell types.

Fig. S4. Anti-PD-L1 treatment improves the effectiveness of antiangiogenic therapy in RT2-PNET and MMTV-PyMT, but not in NFpp10-GBM.

Fig. S5. Antiangiogenic + anti-PD-L1 treatment correlates with an immunostimulatory microenvironment and enhanced apoptosis in responsive tumors.

Fig. S6. Antiangiogenic + anti-PD-L1 treatment increases angiostatic activity of intratumoral myeloid cells in responsive tumors.

Fig. S7. LT $\beta$ R agonist and LT $\beta$ R antagonist do not affect TC proliferation or death.

Fig. S8. LT $\beta$ R agonist enhances and LT $\beta$ R antagonist decreases HEVs and T cell influx in RT2-PNET and PyMT tumors.

Table S1. Primers for qPCR-based expression analysis.

Table S2. Summary of experimental *P* values.

**Other Supplementary Material for this manuscript includes the following:**

(available at

[www.sciencetranslationalmedicine.org/cgi/content/full/9/385/eaak9679/DC1](http://www.sciencetranslationalmedicine.org/cgi/content/full/9/385/eaak9679/DC1))

Movie S1 (.avi format). HEVs with T cells in D + P + Ag-treated mice.  
Movie S2 (.avi format). HEVs without T cells 1 in D + P + Ag-treated mice.  
Movie S3 (.avi format). HEVs without T cells 2 in D + P + Ag-treated mice.

## Materials and Methods

### Animal studies

C57BL/6 Rip1-Tag2 mice were treated beginning at 13 weeks of age for two weeks (response phase) or four weeks (relapse phase) with 40 mg/kg DC101 and/or 10 mg/kg anti-PD-L1. For triple combination cohorts, LT $\beta$ R agonist or antagonist was dosed at 2 mg/kg the day after DC101 + anti-PD-L1. All drugs were injected intraperitoneally (i.p.) twice a week. For tumor burden analysis of Rip1-Tag2 mice (Fig 3A), the following numbers of mice were used: control IgG two weeks (13-15W) n=8, DC101 two weeks (13-15W) n=8, anti-PD-L1 2W (13-15W) n=8, combination DC101 + anti-PD-L1 two weeks (13-15W) n=11, DC101 four weeks (13-17W) n=11, combination DC101 + anti-PD-L1 four weeks (13-17W) n=11. Tumor burden measurement for each Rip1-Tag2 mouse was equal to the sum of individual tumors per mouse.

Orthotopic breast cancer experiments were performed using a cell line generated from FVB MMTV-PyMT mammary tumors (Zena Werb, UCSF). 100,000 PyMT cells were implanted into the 4th mammary fat pad of FVB/n female mice, then allowed to establish until they reached approximately 5 mm in diameter. Mice were then dosed with single, double, or triple combinations of DC101, anti-PD-L1, and LT $\beta$ R agonist or antagonist as described in the preceding paragraph. For tumor burden analysis of MMTV-PyMT tumor-bearing mice, 15 mice were used for each group (IgG two weeks, DC101 two weeks, anti-PD-L1 two weeks, combination of DC101 + anti-PD-L1 two weeks, Fig. 3A). For survival trials, 4 mice per cohort were used (Fig. 7G).

Orthotopic glioblastoma experiments were performed using the cell line NFpp10 generated from embryonic C57/Bl6 neural stem cells infected with shP53-shNF1 and shPTEN-containing lentiviral vectors (Inder Verma, Salk Institute) (68).  $2 \times 10^5$  NFpp10-GBM cells were implanted into the striatum (x=0.1 mm; y=2 mm on the right; z=3 mm) of C57BL/6

females and males. Nine days later, mice were dosed with single drugs and combination of 15 mg/kg B20S and 10 mg/kg anti-PD-L1 twice a week by i.p. injection over two weeks. For experiments assessing the HEV formation through the activation of the LT $\beta$ R signaling, 2 mg/kg of anti-LT $\beta$ R antibody was administered twice weekly in combination with B20S and anti-PD-L1 over two weeks. Tumor burden of NFpp10-GBM-bearing mice was defined by excising and measuring the GFP<sup>+</sup> tumor from the brain under a binocular fluorescent microscope. 4 mice were used for each group (IgG two weeks, anti-LT $\beta$ R two weeks, combination + anti-PDL1 two weeks, and combination B20S + anti-PD-L1 + anti- LT $\beta$ R two weeks).

Tumor burden for all tumor models was calculated using the following formula to approximate the volume of an ellipsoid:  $0.52 \times (\text{width})^2 \times (\text{length})$ .

### **B20S production**

Anti-mouse and human VEGF B20 biosimilar (B20S) was generated based on the previously published sequence of B20-4.1 (69). The variable regions of the heavy and light chain of B20-4.1 were fused to the constant region of IgG1 and  $\kappa$  chain, respectively. Stable mammalian 293 cell lines for recombinant B20S production were established using the piggyBac transposon system (70). Briefly, the two genes coding for the heavy and light chain were cloned into two different PB-T-RfA transposons. Recombinant B20S was purified using a Protein A affinity column and stored in 50 mM sodium phosphate buffer containing 150 mM NaCl (pH 7.0).

## Gene expression analysis

qPCR expression analyses were performed with the indicated primer sets (table S1) on cell lines in vitro or FACS-sorted tumor cell populations ex vivo. For ex vivo studies, pre-amplified cDNA from sorted cells was made using the Cells Direct kit (Invitrogen, #11754100) according to the manufacturer's protocol. qPCR was then performed on an AB7900HT instrument (Applied Biosystems) by using the pre-amplified cDNA for the target genes. qPCR analysis was performed using Power-Up SYBR green mastermix (Thermo Scientific, #A25742). Relative gene expression was calculated as previously described (71). In brief, *Rpl19* or *Gapdh* were used as housekeeping genes to generate  $\Delta Ct$ .  $\Delta Ct$  values from untreated mice were used as reference for the treatment groups to generate  $\Delta\Delta Ct$ , and relative gene expression was calculated as  $2^{(-\Delta\Delta Ct)}$ , or presented as copy number/1,000 copies of *Gapdh* to calculate gene expression. Analyses of sorted cells from tumor-bearing mice were performed using at least two independent experiments and a minimum of 3 to 5 experimental mouse replicates for each treatment condition. All reactions were run in duplicate. For primer sequences, see table S1.

## FACS

Brefeldin A (Ebioscience, #00-4506-51) was intraperitoneally injected into tumor-bearing mice six hours before tumor harvest to enable flow cytometric detection of T cells and intracellular cytokines (72). Tumors were then harvested from PBS-perfused mice and processed as previously described (17). Cells were treated with Fc-block and stained with allophycocyanine (APC)-conjugated anti-CD3 (clone 17A2, BioLegend, #100235), brilliant violet 510-conjugated anti-CD4 (clone RM4-5, BioLegend, #100533), evolve 655-conjugated anti-CD8 (clone 53-6.7, eBioscience, #86-0081-41), phycoerythrin (PE)-conjugated anti-

Granzyme B (clone NGZB, eBioscience, #12-8898-82), peridinin chlorophyll-Cy5.5 (PerCP-Cy5.5)-conjugated anti-interferon- $\gamma$  (clone XMG1.2, eBioscience, 47-7311-80), PE-conjugated anti-PD-L1 (clone 10F.9G2, Molecular Probes, #A18683), PerCP-Cy5.5-conjugated anti-CD45 (clone 30F-11, eBioscience, 45-0451-80), efluor 450-conjugated anti-CD11c (clone N418, eBioscience, #48-0114-80), APC-conjugated anti-CD31 (clone 390, eBioscience, #17-0311-80), brilliant violet 510-conjugated anti-CD11b (BioLegend, #101245), fluorescein isothiocyanate (FITC)-conjugated anti-insulin (CST, #9016S), FITC-conjugated anti-EpCAM (clone G8.8, eBioscience, #11-5791-80). CTLs were sorted as CD3<sup>+</sup>CD8<sup>+</sup> cells. Tumor cells were sorted as CD45<sup>-</sup>insulin<sup>+</sup> cells from tumors of RT2-PNET mice, CD45<sup>-</sup>EpCAM<sup>+</sup> cells from tumors of MMTV-PyMT mice, and CD45<sup>-</sup>GFP<sup>+</sup> cells from tumors of NFpp10-GBM mice. Endothelial cells were identified as CD45<sup>-</sup>CD31<sup>+</sup> cells, and myeloid cells were recognized as CD45<sup>+</sup>CD11b<sup>+</sup> cells. Dendritic cells were isolated as CD45<sup>+</sup>CD11c<sup>+</sup> and CD11b<sup>+</sup>CD11c<sup>+</sup> cells. Compensation was performed using singly-stained beads (BD Biosciences, #560499). Data were analyzed using FlowJo software (Treestar). Analyses of sorted cells from tumor-bearing mice were performed using at least two independent experiments and a minimum of 3 to 5 experimental mouse replicates for each treatment condition.

### **Immunostaining**

Immunohistochemistry and Immunofluorescence were conducted on frozen tissue sections. To prepare frozen tissue, excised pancreata or tumors were fixed in 2-4% paraformaldehyde at 4°C overnight followed by 30% sucrose at 4°C overnight before being embedded in OCT (Tissue Tek). Tumor tissue sections were stained with Alexa Fluor (AF) 488-conjugated anti-MECA79 (eBioscience, #53-6036-82), APC-conjugated anti-CD45 (clone 30-F11, eBioscience, #17-045-1-82), FITC-conjugated anti-CD31 (clone MEC13.3, BD Pharmingen,

#553372), APC-conjugated anti-CD31 (clone 390, eBioscience, #17-0311-80), PE-conjugated anti-PD-L1 (clone 10F.9G2, Molecular probes, #A18683), PE-conjugated CD11c (clone N418, eBioscience, #12-0114-82), AF 647-conjugated anti-CD4 (clone RM4-5, BioLegend, #100530 ), APC-conjugated anti-CD3 (clone 17A2, BioLegend, #100236), APC-conjugated anti-CD8 (clone 53-6.7, eBioscience, #100711), FITC-conjugated anti-B220 (clone RA3-6B2, ebioscience, #11-0452-82), biotinylated anti-Granzyme B (R&D Systems, #BAF1865) anti-CD31 (Millipore, #MAB1398Z), anti-CD31 (Abcam, #28364), anti-phospho-S6 (CST, #4858), anti-CA9 (Novus Biologicals, #NB100-417), and anti-cleaved caspase 3 (CST, #9664). When primary antibodies were unlabeled, fluorophore-conjugated secondary antibodies were used. Images were taken with an Observer Z1 microscope (Zeiss) linked to an AxioCam MRM camera (Zeiss) with objectives of 20x or 40x magnification. Image analysis and quantitation were performed using NIH ImageJ software on 3 representative images per mouse from at least 3 mice per group from each tumor model.

### **Evaluation of necrosis**

Frozen tissue sections of tumors were histochemically stained with hematoxylin-eosin (H&E). H&E sections were subsequently imaged under fluorescence conditions (488 nm), using a LeicaDM5500 fluorescent microscope (10x magnification), allowing for identification of necrotic regions through autofluorescent properties of necrotic cells (73). Necrosis was quantified by measuring the fluorescent areas and normalized to the total tumor area using NIH ImageJ software.

## **Cell death and proliferation**

Cell death of cultured tumor cells from RT2-PNET ( $\beta$ -TC3), MMTV-PyMT, and NFpp10-engineered GBM treated with LT $\beta$ R agonist or antagonist was assessed using the Bioluminescence Cytotoxicity Assay Kit (BioVision, # K312-500), and proliferation was analyzed using the MTS Cell Proliferation Colometric Assay Kit (Biovision, #K300-500) according to the manufacturer's instructions; 22 mM H<sub>2</sub>O<sub>2</sub> treatment was a positive control for the cytotoxicity assay. Analyses were performed using 6 replicates for each treatment condition.

## **Cell culture and RNA extraction**

Bone marrow-derived cells (BDMCs) were isolated from C57B/L6 long bones (femurs and tibiae) of adult mice and cultured in complete RPMI medium supplemented with 20 ng/ml Granulocyte-macrophage colony-stimulating factor (GM-CSF). Non-adherent cells were removed at day 2, and fresh medium with 20 ng/ml GM-CSF was added for culturing attached BMDCs.  $\beta$ -TC3 RT2-PNET and MMTV-PyMT cells were cultured in DMEM high glucose supplemented with sodium pyruvate, non-essential amino acids, glutamine, and 10% FBS. NFpp10-GBM cells were cultured in DMEM: Ham's F12 medium supplemented with N-2 (Gibco), 50  $\mu$ g/ml of heparin, and 20 ng/ml each of bFGF and EGF. HcMEC/D3 were cultured in complete EBM-2 medium (Lonza). Cells were plated on 48-well plates and treated for the indicated amounts of time as follows: B20S (50  $\mu$ g/ml), IFN $\gamma$  (50 ng/ml), or 1% O<sub>2</sub> (hypoxia). Cells were then washed with cold PBS, and RNA extraction was performed with TRIzol (Invitrogen).



**Supplementary Figures:**

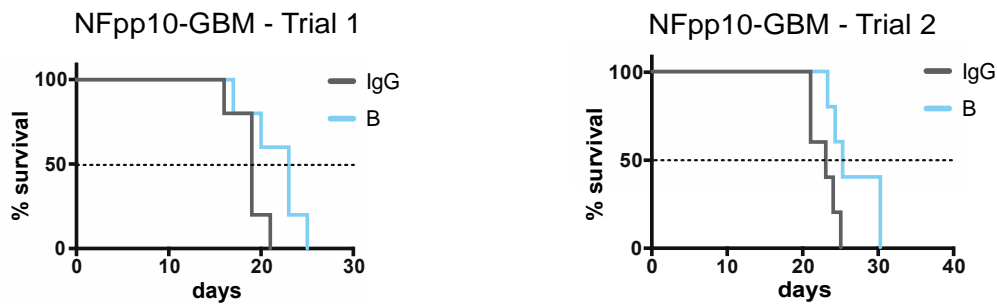

**Fig. S1. Anti-VEGF therapy (B20S) does not prolong survival of NFpp10-GBM-bearing mice.** Survival of NFpp10-GBM-bearing mice treated with either IgG or B (B20S). For all panels: IgG, n=4-5; B, n=5. Dotted line indicates 50% survival. Trial 1, p=0.1064 vs IgG; Trial 2, p=0.0858 vs IgG; Log-rank test for survival.

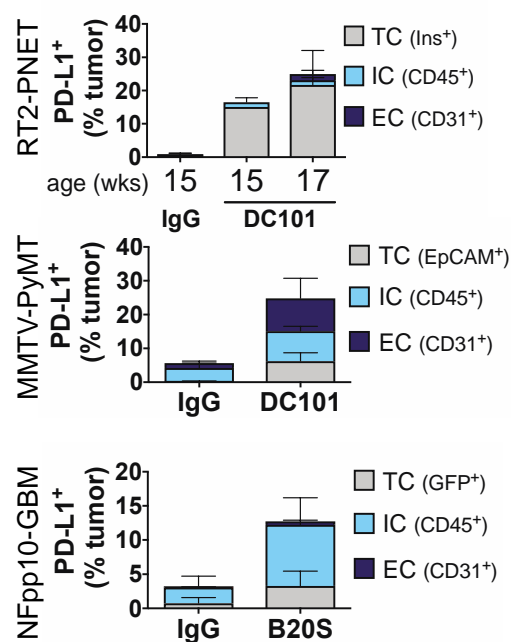

**Fig. S2. PD-L1 up-regulation during antiangiogenic therapy correlates with tumor relapse.** Quantitation of PD-L1<sup>+</sup> tumor cells, endothelial cells (CD31<sup>+</sup>), and immune cells (CD45<sup>+</sup>) by immunofluorescent staining in tumor sections from RT2-PNET, MMTV-PyMT,

and NFpp10-GBM mice treated with IgG, DC101, or B20S. Data are represented as mean  $\pm$  SEM. RT2-PNET: DC101 15W (n=5) vs IgG 15W (n=8), p=0.0041 for TC, p=0.0452 for IC, p=0.237 for EC; DC101 17W (n=7) vs IgG 15W, p=0.0014 for TC, p=0.0023 for IC, p=0.0121 for EC. MMTV-PyMT: DC101 (n=7) vs IgG (n=5), p=0.0025 for TC, p=0.0424 for IC, p=0.0159 for EC. NFpp10-GBM: B20S (n=6) vs IgG (n=7), p=0.0140 for TC, p=0.0012 for IC, p=0.1 for EC. Statistical analysis by Mann-Whitney test.

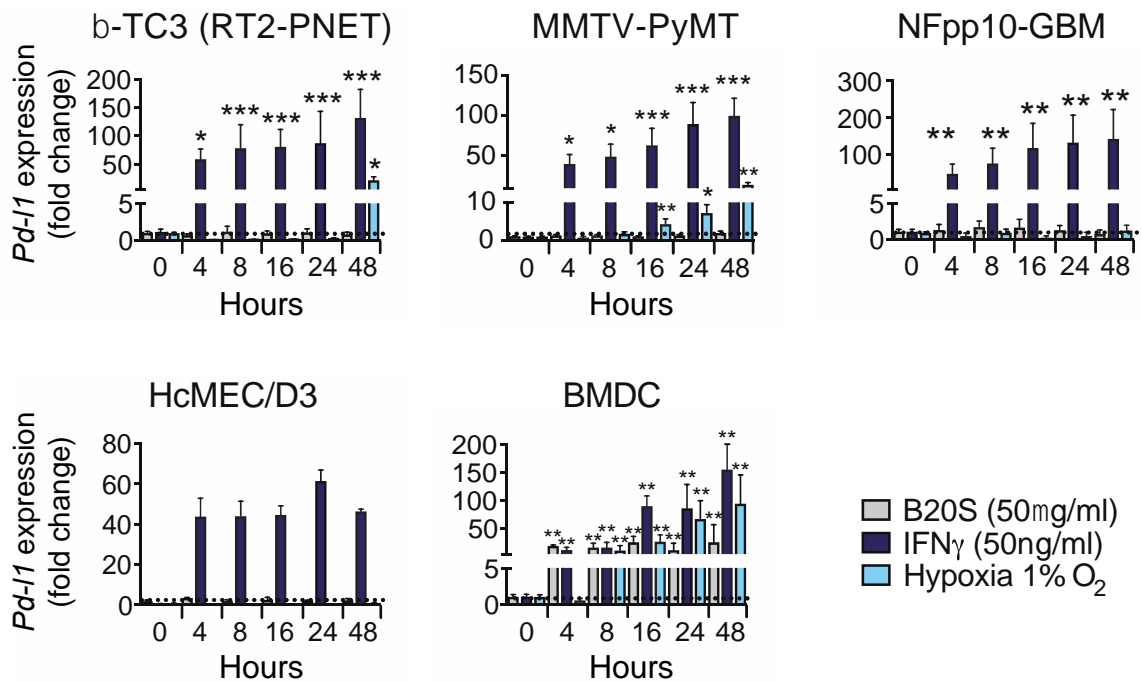

**Fig. S3. IFN $\gamma$  induces PD-L1 expression in several cell types.** qPCR-based assessment of PD-L1 expression in tumor cells from RT2-PNET ( $\beta$ -TC3) and MMTV-PyMT mice as well as NFpp10-engineered GBM cells, human microvascular endothelial cells (HcMEC/D3), and murine bone marrow-derived cells (BMDCs), treated for different amounts of time with either B20S or interferon- $\gamma$  (IFN $\gamma$ ), or incubated with 1% O $_2$ . Dotted line indicates baseline gene expression in untreated samples. Data are represented as mean  $\pm$  SEM. \*p<0.05; \*\*p<0.01; \*\*\*p<0.001; Mann-Whitney test. Black asterisks represent p-values for comparisons between untreated conditions and different time points for the same treatment.

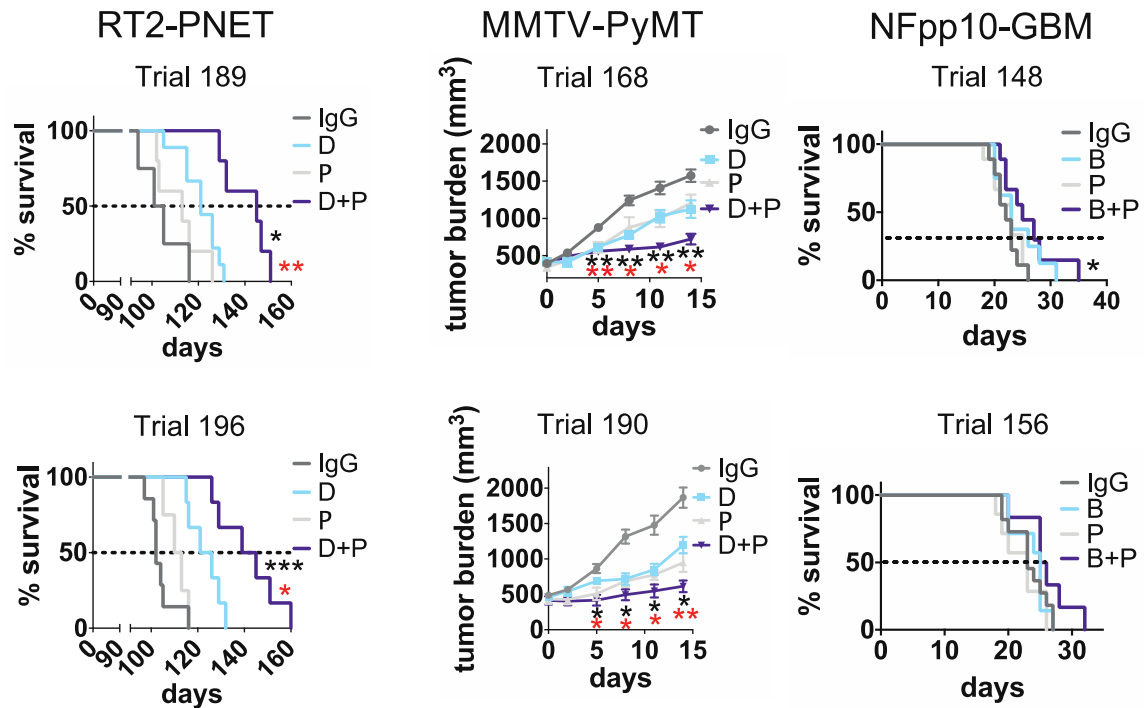

**Fig. S4. Anti-PD-L1 treatment improves the effectiveness of antiangiogenic therapy in RT2-PNET and MMTV-PyMT, but not NFpp10-GBM.** Survival or tumor burden analyses in RT2-PNET, MMTV-PyMT, and NFpp10-GBM mice under different treatment conditions. IgG (RT2-PNET: trial 189, n=4; trial 196, n=7; MMTV-PyMT: trial 168, n=6; trial 190, n=4; NFpp10-GBM: trial 148, n=9; trial 156, n=11), DC101 (RT2-PNET: trial 186, n=5; trial 196, n=6; MMTV-PyMT: trial 168, n=6; trial 190, n=5), or B20S (NFpp10-GBM: trial 148, n=8; trial 156, n=7), anti-PD-L1 (RT2-PNET: trial 189, n=5; trial 196, n=4; MMTV-PyMT: trial 168, n=6; trial 190, n=5; NFpp10-GBM: trial 148, n=9; trial 156, n=7), or combination therapy (RT2-PNET: trial 189, n=5; trial 196, n=6; MMTV-PyMT: trial 168, n=6; trial 190, n=5; NFpp10-GBM: trial 148, n=9; trial 156, n=6). Dotted line indicates 50% survival. Data are represented as mean  $\pm$  SEM for tumor burden. \* $p$ <0.05; \*\* $p$ <0.01; \*\*\* $p$ <0.001; Mann-Whitney test or Log-rank test for survival. Black asterisks represent  $p$ -values for comparisons between IgG and different treatments; red asterisks represent  $p$ -values for other comparisons. D=DC101; P=anti-PD-L1; B=B20S.

**A**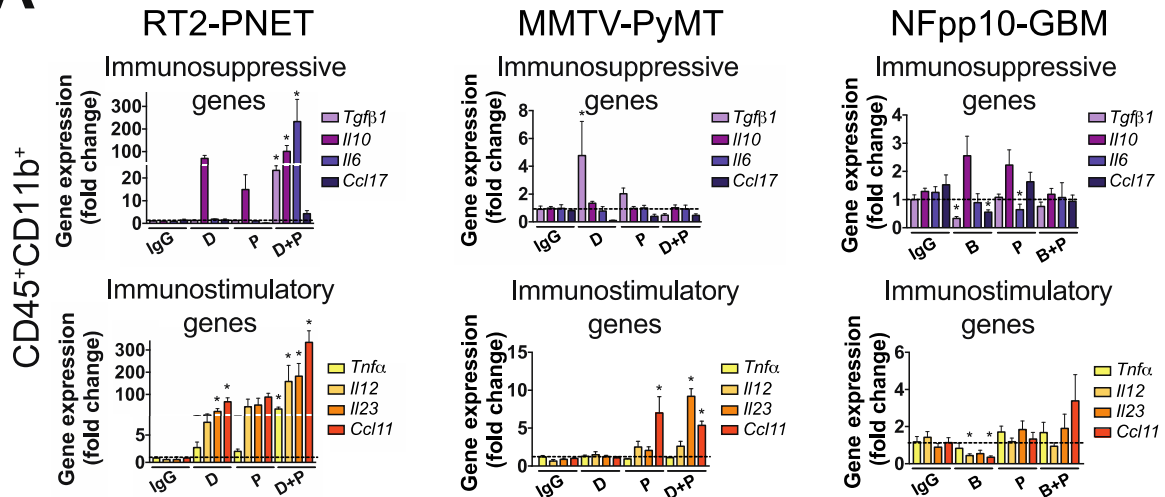**B**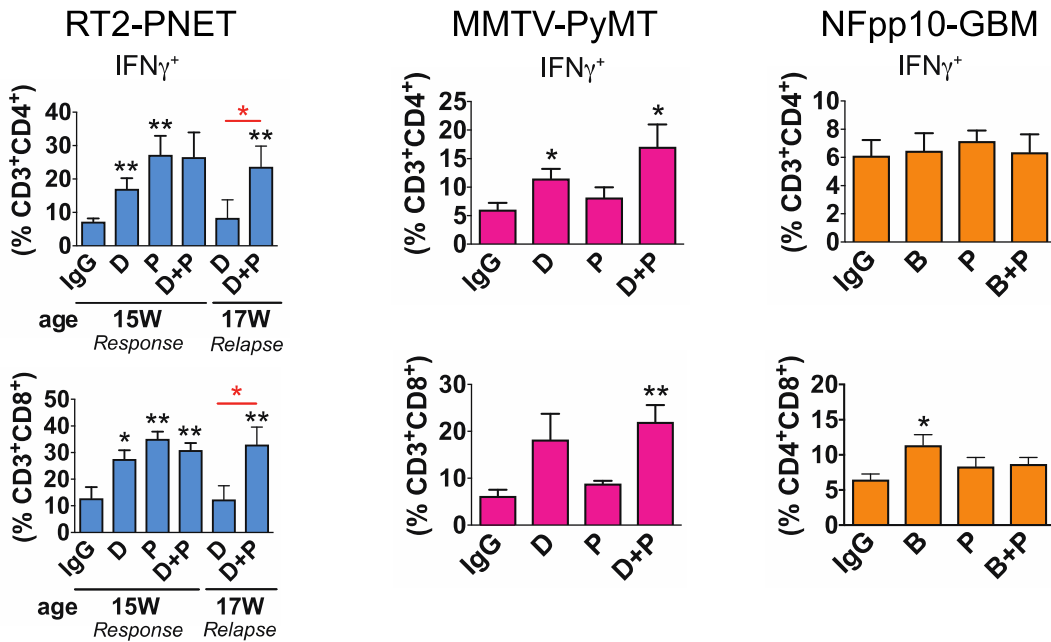**C**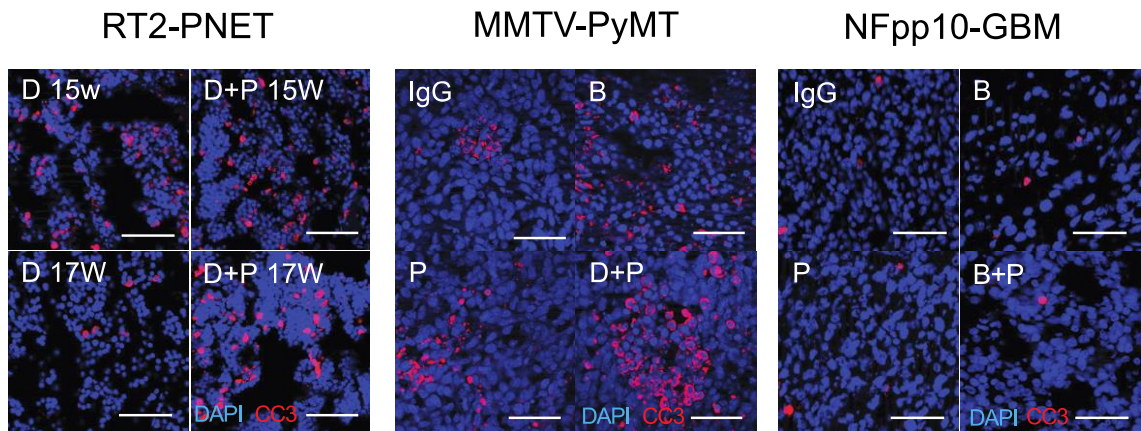

**Fig. S5. Antiangiogenic + anti-PD-L1 treatment correlates with an immunostimulatory microenvironment and enhanced apoptosis in responsive tumors.** (A) qPCR-based expression analyses of immunostimulatory and immunosuppressive genes in CD45<sup>+</sup>CD11b<sup>+</sup> cells from RT2-PNET mice treated for 4 weeks, or MMTV-PyMT and NFpp10-GBM mice treated for 2 weeks. (B) FACS analysis of IFN $\gamma$ <sup>+</sup>CD3<sup>+</sup>CD4<sup>+</sup> and IFN $\gamma$ <sup>+</sup>CD3<sup>+</sup>CD8<sup>+</sup> T cells in RT2-PNET (IgG, n=6/6; D/15W, n=6/6; P, n=6/6; D+P/15W, n=7/6; D/17W, n=3/3; D+P/17W, n=6/5), MMTV-PyMT (IgG, n=6/5; D, n=6/6; P, n=7/4; D+P, n=6/6), and NFpp10-GBM (IgG, D, P, D+P, n=6/7). (C) Representative images of CC3<sup>+</sup> cells in RT2-PNET, MMTV-PyMT, and NFpp10-GBM tumors. Scale bars, 50  $\mu$ m. Dotted line indicates baseline gene expression in IgG-treated samples. Data are represented as mean  $\pm$  SEM. \*p<0.05; \*\*p<0.01; Mann-Whitney test. Black asterisks represent p-values for comparisons between IgG and different treatments; red asterisks represent p-values for other comparisons. D=DC101; P=anti-PD-L1; B=B20S; IFN $\gamma$ =interferon- $\gamma$ ; CC3=cleaved caspase 3.

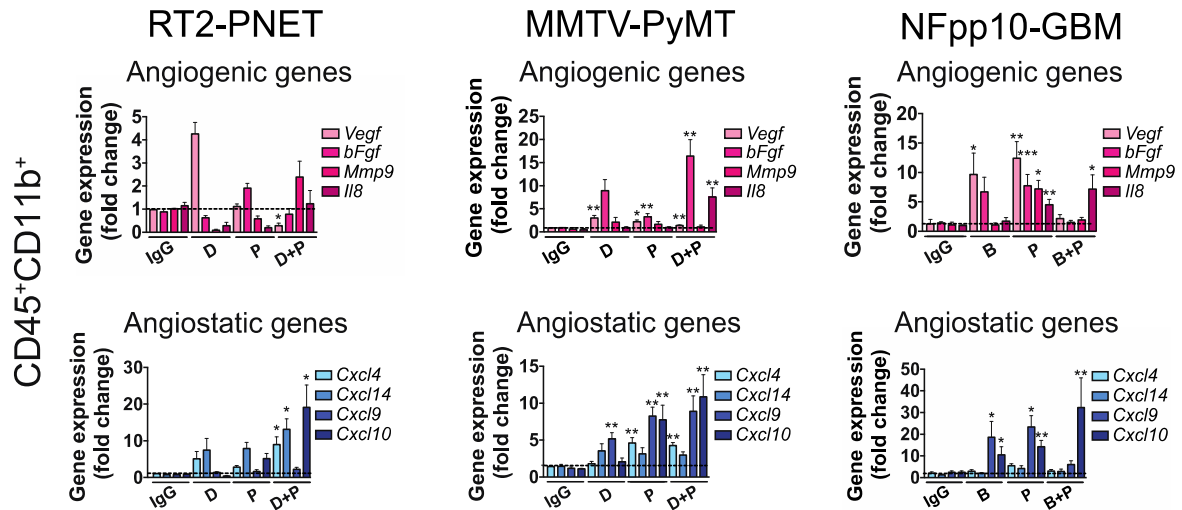

**Fig. S6. Antiangiogenic + anti-PD-L1 treatment increases angiostatic activity of intratumoral myeloid cells in responsive tumors.** qPCR-based expression analyses of angiogenic and angiostatic genes in CD45<sup>+</sup>CD11b<sup>+</sup> cells from RT2-PNET, MMTV-PyMT, and NFpp10-GBM tumors after 2 weeks of treatment. Dotted line indicates baseline gene expression in IgG-treated samples. Data are represented as mean  $\pm$  SEM. \* $p < 0.05$ ; \*\* $p < 0.01$ ; \*\*\* $p < 0.001$ ; Mann-Whitney test. Black asterisks represent p-values for comparisons between IgG and different treatments. D=DC101; P=anti-PD-L1; B=B20S.

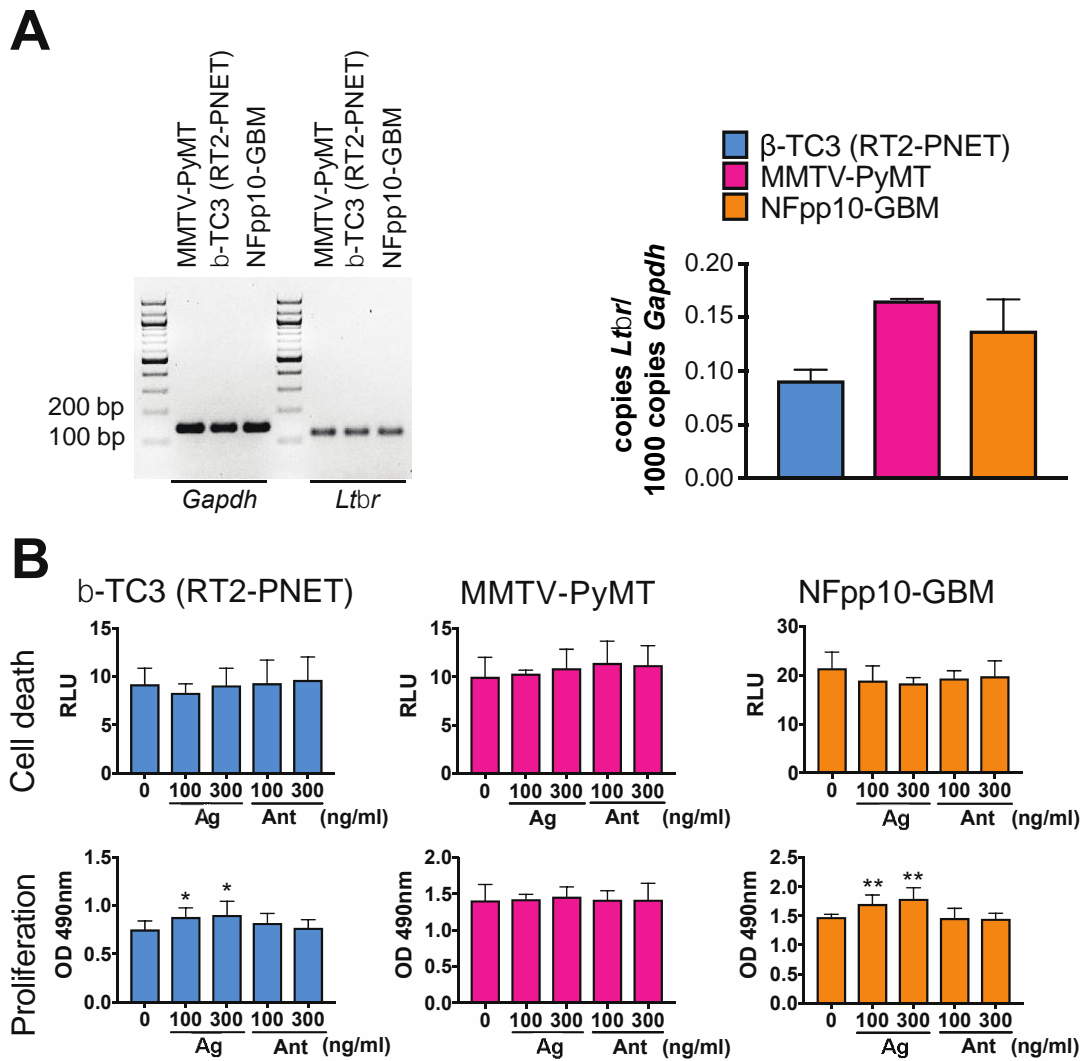

**Fig. S7.  $LT\beta R$  agonist and  $LT\beta R$  antagonist do not affect TC proliferation or death. (A)** qPCR-based expression analysis for *Ltbri* expression in tumor cell lines was performed in triplicate using *Gapdh* as a control. Products were run on an agarose gel. *Ltbri* expression relative to *Gapdh* for  $\beta$ -TC3 (RT2-PNET), MMTV-PyMT, and NFpp10-GBM cell lines. **(B)** Cell death/cytotoxicity was assessed using the Bioluminescence Cytotoxicity Assay kit, and proliferation was analyzed using the MTS Cell Proliferation Colorimetric Assay kit at 48 hours after treatment with the  $LT\beta R$  agonist and antagonist. Data are represented as mean  $\pm$  SEM. \* $p < 0.05$ ; \*\* $p < 0.01$ ; Mann-Whitney. Black asterisks represent p-values for comparisons between control and differing treatments. Ag=anti- $LT\beta R$  agonist; Ant=anti- $LT\beta R$  antagonist.



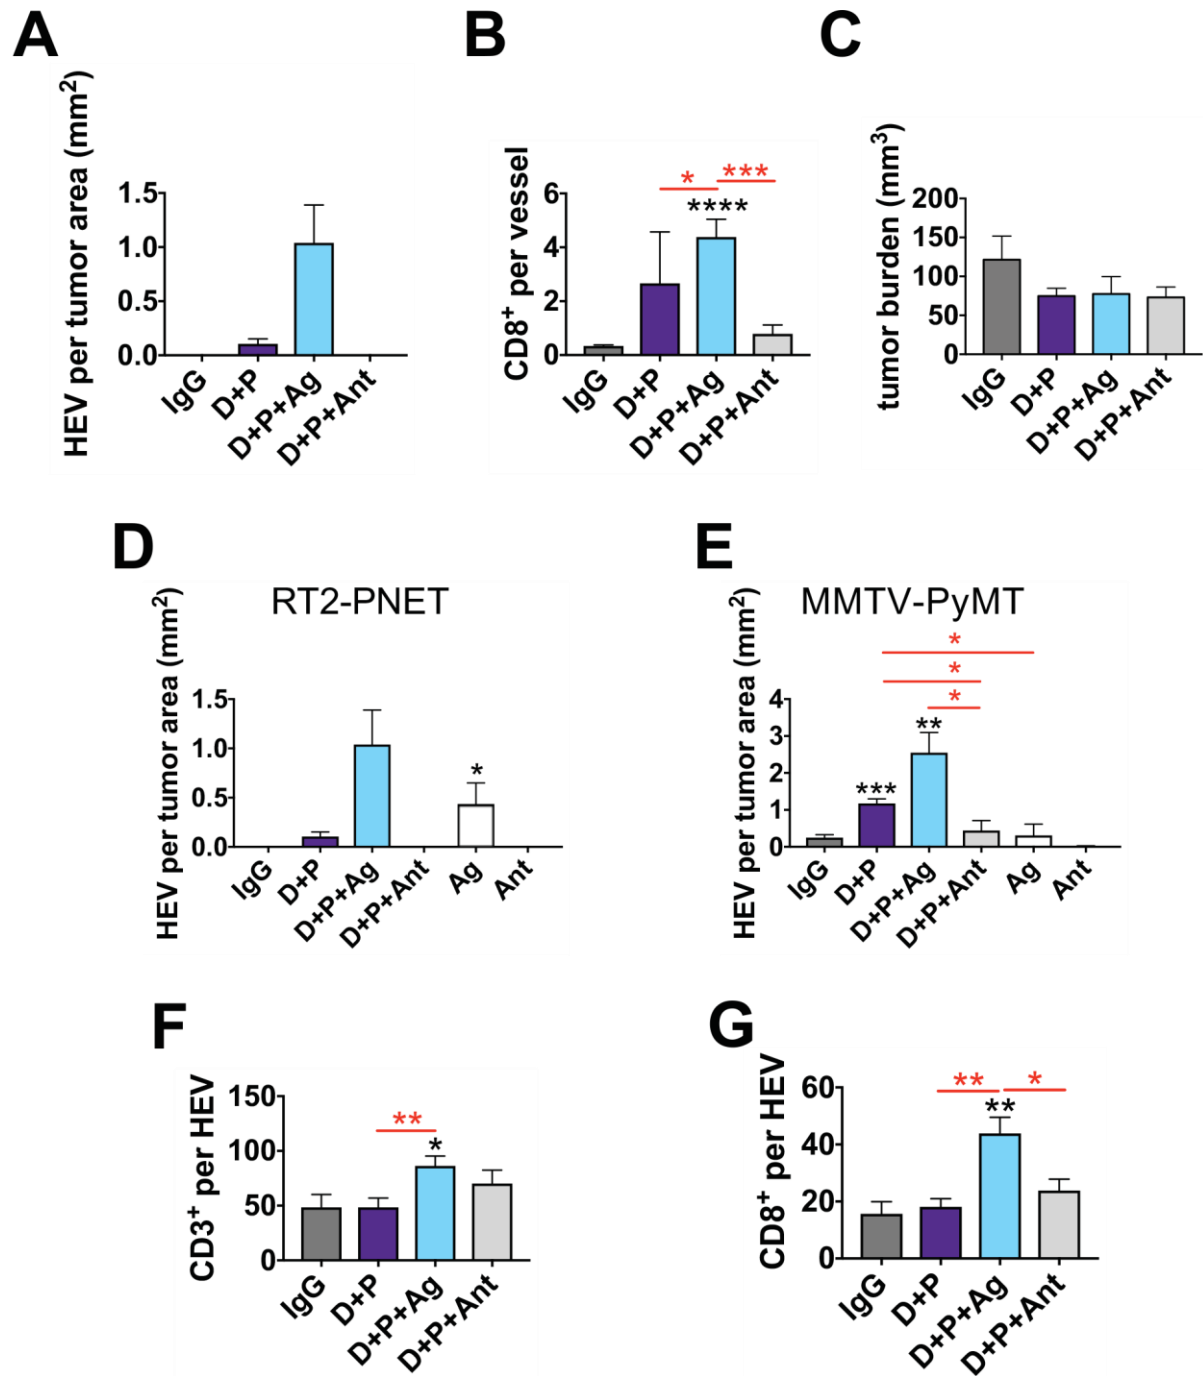

**Fig. S8. LT $\beta$ R agonist enhances and LT $\beta$ R antagonist decreases HEVs and T cell influx in RT2-PNET and PyMT tumors.** (A) Number of HEVs/mm<sup>2</sup> tumor area. IgG, n=4; D+P, n=5; D+P+Ag, n=4; D+P+Ant, n=3. (B) Number of CD8<sup>+</sup> cells around tumor vessels. IgG, n=7 (0 HEVs); D+P, n=8 (1 HEV); D+P+Ag, n=41 (26 HEVs); D+P+Ant, n=8 (1 HEV). (C) Tumor burden of RT2-PNET mice under different treatment conditions. IgG, n=6; D+P, n=4; D+P+Ag, n=4; D+P+Ant, n=6. (D) Number of HEVs/mm<sup>2</sup> tumor area in RT2-PNET. IgG,

n=4; D+P, n=5; D+P+Ag, n=4; D+P+Ant, n=3; Ag, Ant, n=3. (E) Number of HEVs/mm<sup>2</sup> tumor area in MMTV-PyMT. IgG, D+P, n=8; D+P+Ag, D+P+Ant, n=5; Ag, Ant, n=2. (F) Number of CD3<sup>+</sup> cells around HEVs in RT2-PNET. IgG, n=5; D+P, n=11; D+P+Ag, n=28; D+P+Ant, n=10. (G) Number of CD8<sup>+</sup> cells around HEVs in MMTV-PyMT. IgG, n=5; D+P, n=11; D+P+Ag, n=28; D+P+Ant, n=10. Data are represented as mean ± SEM. \*p<0.05; \*\*p<0.01; \*\*\*p<0.001; \*\*\*\*p<0.0001; Mann-Whitney test. Black asterisks represent p-values for comparisons between IgG and different treatments; red asterisks represent p-values for other comparisons. D=DC101; P=anti-PD-L1; Ag=anti-LTβR agonist; Ant=anti-LTβR antagonist.

**Table S1. Primers for qPCR-based expression analysis.**

| Species      | Gene                  | Forward primer (5' → 3')   | Reverse primer (5' → 3')   |
|--------------|-----------------------|----------------------------|----------------------------|
| Mouse        | <i>Gapdh</i>          | CTTTGTCAAGCTCATTTCTGG      | TCTTGCTCAGTGCCTTGC         |
|              | <i>Rpl19</i>          | CTGGATGAGAAGGATGAGGATC     | GGATGTGCTCCATGAGGATG       |
|              | <i>Vegf</i>           | CAGGCTGCTGTAACGATGAA       | GCATTCACATCTGCTGTGCT       |
|              | <i>bFgf</i>           | GGCTGCTGGCTTCTAAGTGT       | CCGTTTTGGATCCGAGTTTA       |
|              | <i>Mmp9</i>           | GCCCTGGAACCTCACACGACA      | TTGGAAACTCACACGCCAGAAG     |
|              | <i>Il8</i>            | TGCCCTACGGTGGAAAGTCATA     | TGCATTCCGCTTAGCTTTCTTT     |
|              | <i>Cxcl4</i>          | TGCACTTAAGAGCCCTAGACCCAT   | AGATCTCCATCGCTTTCTTCGGGA   |
|              | <i>Cxcl14</i>         | GAAGATGGTTATCGTCACCACC     | CGTTCAGGCATTGTACCACT       |
|              | <i>Cxcl9</i>          | GGAGTTCGAGGAACCCTAGTG      | GGGATTTGTAGTGGATCGTGC      |
|              | <i>Cxcl10</i>         | TCCCTCTCGCAAGGAC           | TTGGCTAAACGCTTTTCAT        |
|              | <i>Tgfβ1</i>          | GCGGACTACTATGCTAAAGAGGTCAC | TTTCTCATAGATGGCGTTGTTGC    |
|              | <i>Il10</i>           | CAGGGATCTTAGCTAACGGAAA     | GCTCAGTGAATAAATAGAATGGGAAC |
|              | <i>Il6</i>            | GAGGATACCACTCCCAACAGACC    | AAGTGCATCATCGTTGTTCATACA   |
|              | <i>Ccl17</i>          | ACCATGAGGTCACCTCAGATGC     | AATGGCCCCCTTGAAGTAATCC     |
|              | <i>Tnfa</i>           | CGGAGTCCGGGCAGGT           | GCTGGGTAGAGAATGGATGAACA    |
|              | <i>Il12</i>           | AGTCCCTTTGGTCCAGTGTG       | AGCAGTAGCAGTTCCCCTGA       |
|              | <i>Il23</i>           | CCAGCGGGACATATGAATCT       | AGGCTCCCCTTTGAAGATGT       |
|              | <i>Ccl11</i>          | GAATCACCAACAACAGATGCAC     | ATCCTGGACCCACTTCTTCTT      |
|              | <i>Pd-1</i>           | GACGCAGGCGTTTACTGCT        | GCGGTATGGGGCATTGACTTT      |
|              | <i>Light</i>          | GCATCAACGTCTTGAGACA        | ATACGTCAAGCCCCTCAAGA       |
|              | <i>Il7</i>            | TTCCTCCAAGTATCCTTGTCT      | AGCAGCTTCTTTGTATCATCAC     |
|              | <i>Ccl7</i>           | ATTATGGGTGGTGGAGCCG        | CCAGGGACACCGACTACTG        |
|              | <i>Ccl21</i>          | GTGATGGAGGGGGTCAGGA        | GGGATGGGACAGCCTAAACT       |
|              | <i>Ccl19</i>          | ATGTGAATCACTCTGGCCCAGGAA   | AAGCGGCTTTATTGGAAGCTCTGC   |
|              | <i>Cxcl13</i>         | GGCCACGGTATTCTGGAAGC       | GGGCGTAACCTGAATCCGATCTA    |
|              | <i>Glycam1</i>        | CCACCAGCTACACCAGTGAG       | CCTGGGCCTCTTGATTCTCTG      |
|              | <i>Cd40</i>           | GCAGTGTGTTACGTGCAGTG       | TGTGCAGTGGCTTGTCAGTC       |
|              | <i>Perforin</i>       | AAAAACTCCCTAATGAGAGACGC    | ACACGCCAGTCGTTATTGATATT    |
| <i>Mx1</i>   | CAAAGCCCTGGAAGAGTCTG  | GGGATCTGTCTCCAATATT        |                            |
| <i>Ifit3</i> | AGCACAGAAACAGATCACCAT | CACCCTGTCTTCATATGACTG      |                            |
| <i>Ltβr</i>  | TGGTGCCCCCTTATCGCATA  | TGCATACCGCAAAGACAAACTC     |                            |
| Human        | <i>GAPDH</i>          | AAGGTGAAGGTCGGAGTCAA       | AATGAAGGGGTCATTGATGG       |
|              | <i>PD-L1</i>          | TGGCATTGCTGAACGCATTT       | TGCAGCCAGGTCTAATTGTTTT     |

**Table S2. Summary of experimental *P* values.**

| Fig 2A, B, C  | % CA9 <sup>+</sup> PD-L1 <sup>+</sup> | IFN $\gamma$ <sup>+</sup><br>% CD3 <sup>+</sup> CD4 <sup>+</sup> | IFN $\gamma$ <sup>+</sup><br>% CD3 <sup>+</sup> CD8 <sup>+</sup> | % GzB <sup>+</sup> |
|---------------|---------------------------------------|------------------------------------------------------------------|------------------------------------------------------------------|--------------------|
| RT2-PNET      |                                       |                                                                  |                                                                  |                    |
| IgG vs. DC101 | 0.0216                                | 0.0022                                                           | 0.026                                                            | 0.026              |
| MMTV-PyMT     |                                       |                                                                  |                                                                  |                    |
| IgG vs. DC101 | 0.0089                                | 0.026                                                            | 0.0519                                                           | 0.026              |
| NFpp10-GBM    |                                       |                                                                  |                                                                  |                    |
| IgG vs. B20S  | 0.0476                                | 0.6991                                                           | 0.0262                                                           | 0.0152             |

| Fig 2D     | <i>Cxcl10</i>                       |                                     | <i>Mx1</i>                          |                                     | <i>Ifit3</i>                        |                                     |
|------------|-------------------------------------|-------------------------------------|-------------------------------------|-------------------------------------|-------------------------------------|-------------------------------------|
|            | PD-L1 <sup>-</sup><br>IgG vs. DC101 | PD-L1 <sup>+</sup><br>IgG vs. DC101 | PD-L1 <sup>-</sup><br>IgG vs. DC101 | PD-L1 <sup>+</sup><br>IgG vs. DC101 | PD-L1 <sup>-</sup><br>IgG vs. DC101 | PD-L1 <sup>+</sup><br>IgG vs. DC101 |
| RT2-PNET   |                                     |                                     |                                     |                                     |                                     |                                     |
| TC         | 0.1049                              | 0.3282                              | 0.007                               | 0.1304                              | 0.1049                              | 0.1949                              |
| EC         | 0.0003                              | 0.0281                              | 0.0002                              | 0.0003                              | 0.0104                              | 0.0006                              |
| IC         | 0.5054                              | 0.0047                              | 0.5737                              | 0.083                               | 0.1949                              | 0.003                               |
| MMTV-PyMT  |                                     |                                     |                                     |                                     |                                     |                                     |
| TC         | 0.0002                              | 0.0207                              | 0.1049                              | 0.2786                              | 0.0002                              | 0.0379                              |
| EC         | 0.0002                              | 0.0379                              | 0.0002                              | 0.1605                              | 0.0002                              | 0.6126                              |
| IC         | 0.8785                              | 0.0047                              | 0.0379                              | 0.0499                              | 0.5737                              | 0.0003                              |
| NFpp10-GBM |                                     |                                     |                                     |                                     |                                     |                                     |
| TC         | 0.9143                              | 0.0095                              | >0.9999                             | 0.0381                              | 0.2571                              | 0.0095                              |
| EC         | 0.9429                              | 0.1143                              | 0.1095                              | 0.6429                              | 0.2                                 | 0.8048                              |
| IC         | >0.9999                             | >0.9999                             | 0.1333                              | 0.7546                              | 0.8                                 | 0.008                               |

| Fig 3A RT2-PNET | Tumor burden |
|-----------------|--------------|
| IgG vs. D 15W   | 0.0006       |
| IgG vs. P 15W   | 0.1369       |
| IgG vs. D+P 15W | <0.0001      |
| D vs. D+P 15W   | 0.0127       |
| P vs. D+P 15W   | 0.0046       |
| IgG vs. D 17W   | 0.8559       |
| IgG vs. D+P 17W | 0.0165       |
| D vs. D+P 17W   | 0.0052       |

| Fig 3A RT2-PNET | % Survival |
|-----------------|------------|
| IgG vs. D       | 0.0002     |
| IgG vs. P       | 0.1473     |
| IgG vs. D+P     | <0.0001    |
| D vs. D+P       | 0.0009     |
| P vs. D+P       | <0.0001    |

| Fig 3A MMTV-PyMT | Day 0  | Day 2  | Day 5  | Day 8  | Day 11 | Day 14 |
|------------------|--------|--------|--------|--------|--------|--------|
| IgG vs. D        | 0.5584 | 0.0931 | 0.0649 | 0.0022 | 0.0022 | 0.0022 |
| IgG vs. P        | 0.6991 | 0.132  | 0.0152 | 0.0043 | 0.0152 | 0.0411 |
| IgG vs. D+P      | 0.4848 | 0.4848 | 0.0022 | 0.0022 | 0.0022 | 0.0022 |
| D vs. D+P        | 0.1017 | 0.3939 | 0.1926 | 0.132  | 0.0043 | 0.0043 |
| P vs. D+P        | 0.2554 | 0.3939 | 0.0931 | 0.0152 | 0.0022 | 0.0022 |

| Fig 3B          | % CD11b <sup>+</sup> pS6 <sup>+</sup> |
|-----------------|---------------------------------------|
| RT2-PNET        |                                       |
| IgG vs. D 15W   | 0.8203                                |
| IgG vs. D+P 15W | 0.8203                                |
| D vs. D+P 15W   | 0.1985                                |
| IgG vs. D 17W   | 0.0401                                |
| IgG vs. D+P 17W | 0.5339                                |
| D vs. D+P 17W   | 0.0102                                |
| MMTV-PyMT       |                                       |
| IgG vs. D       | 0.0424                                |
| IgG vs. P       | 0.038                                 |
| IgG vs. D+P     | 0.0001                                |
| D vs. D+P       | <0.0001                               |
| P vs. D+P       | 0.091                                 |
| NFpp10-GBM      |                                       |
| IgG vs. B       | 0.0083                                |
| IgG vs. P       | 0.0492                                |
| IgG vs. B+P     | 0.0076                                |
| B vs. B+P       | <0.0001                               |
| P vs. B+P       | <0.0001                               |

| Fig 3C          | CD8 <sup>+</sup> | GzB <sup>+</sup> |
|-----------------|------------------|------------------|
| RT2-PNET        |                  |                  |
| IgG vs. D 15W   | 0.0258           | 0.026            |
| IgG vs. P 15W   | 0.675            | 0.7771           |
| IgG vs. D+P 15W | 0.0098           | 0.0012           |
| D vs. D+P 15W   | 0.8573           | 0.7308           |
| P vs. D+P 15W   | 0.0082           | 0.0012           |
| IgG vs. D 17W   | 0.9512           | 0.2095           |
| IgG vs. D+P 17W | 0.0105           | 0.0095           |
| D vs. D+P 17W   | 0.0139           | 0.0286           |
| MMTV-PyMT       |                  |                  |
| IgG vs. D       | 0.2075           | 0.0315           |
| IgG vs. P       | 0.3538           | >0.9999          |
| IgG vs. D+P     | 0.0333           | <0.0001          |
| D vs. D+P       | 0.002            | 0.0503           |
| P vs. D+P       | 0.1696           | 0.0078           |
| NFpp10-GBM      |                  |                  |
| IgG vs. B       | 0.0653           | 0.0152           |
| IgG vs. P       | 0.0594           | 0.9329           |
| IgG vs. B+P     | 0.3046           | 0.0015           |
| B vs. B+P       | 0.347            | 0.2136           |
| P vs. B+P       | 0.574            | 0.07             |

| Fig 3D          | % CC3 <sup>+</sup> |
|-----------------|--------------------|
| RT2-PNET        |                    |
| IgG vs. D 15W   | 0.004              |
| IgG vs. P 15W   | 0.0366             |
| IgG vs. D+P 15W | 0.0167             |
| D vs. D+P 15W   | 0.0414             |
| P vs. D+P 15W   | 0.9598             |
| IgG vs. D 17W   | 0.0754             |
| IgG vs. D+P 17W | 0.0069             |
| D vs. D+P 17W   | <0.0001            |
| MMTV-PyMT       |                    |
| IgG vs. D       | 0.1304             |
| IgG vs. P       | 0.5737             |
| IgG vs. D+P     | 0.0002             |
| D vs. D+P       | 0.0011             |
| P vs. D+P       | 0.0011             |
| NFpp10-GBM      |                    |
| IgG vs. B       | 0.9675             |
| IgG vs. P       | 0.7857             |
| IgG vs. B+P     | 0.8413             |
| B vs. B+P       | 0.7922             |
| P vs. B+P       | 0.5714             |

| Fig 4A          | % CD11c <sup>+</sup> |
|-----------------|----------------------|
| RT2-PNET        |                      |
| IgG vs. D 15W   | 0.3312               |
| IgG vs. D+P 15W | 0.006                |
| D vs. D+P 15W   | 0.0124               |
| IgG vs. D 17W   | 0.3                  |
| IgG vs. D+P 17W | 0.0004               |
| D vs. D+P 17W   | 0.002                |
| MMTV-PyMT       |                      |
| IgG vs. D       | 0.5468               |
| IgG vs. P       | 0.3689               |
| IgG vs. D+P     | 0.0227               |
| D vs. D+P       | 0.0245               |
| P vs. D+P       | 0.0911               |
| NFpp10-GBM      |                      |
| IgG vs. B       | 0.9654               |
| IgG vs. P       | 0.5404               |
| IgG vs. B+P     | 0.6941               |
| B vs. B+P       | 0.6913               |
| P vs. D+P       | 0.6160               |

| Fig 4B, C   | <i>Cd40</i> | <i>Il10</i> | <i>Il12</i> | <i>Perforin</i> |
|-------------|-------------|-------------|-------------|-----------------|
| RT2-PNET    |             |             |             |                 |
| IgG vs. D   | 0.602       | 0.097       | 0.004       | 0.0162          |
| IgG vs. P   | 0.0444      | 0.004       | 0.004       | 0.0465          |
| IgG vs. D+P | 0.0059      | 0.0101      | 0.0147      | 0.0004          |
| D vs. D+P   | 0.0032      | 0.0219      | 0.4799      | 0.023           |
| P vs. D+P   | 0.5910      | 0.6419      | 0.0042      | 0.0022          |
| MMTV-PyMT   |             |             |             |                 |
| IgG vs. D   | 0.0162      | >0.9999     | 0.899       | 0.0004          |
| IgG vs. P   | 0.0015      | 0.0066      | 0.0011      | 0.8749          |
| IgG vs. D+P | 0.004       | 0.004       | 0.004       | <0.0001         |
| D vs. D+P   | 0.0002      | 0.0002      | 0.0002      | <0.0001         |
| P vs. D+P   | 0.3100      | 0.6103      | 0.1569      | <0.0001         |
| NFpp10-GBM  |             |             |             |                 |
| IgG vs. B   | 0.198       | 0.0424      | 0.004       | 0.268           |
| IgG vs. P   | 0.004       | 0.6545      | 0.0263      | <0.0001         |
| IgG vs. B+P | >0.9999     | 0.5374      | 0.004       | <0.0001         |
| B vs. B+P   | >0.9999     | 0.1371      | 0.0165      | <0.0001         |
| P vs. D+P   | 0.0019      | >0.9999     | 0.9591      | <0.0001         |

| Fig 5A          | CD31 <sup>+</sup> vessels |
|-----------------|---------------------------|
| RT2-PNET        |                           |
| IgG vs. D 15W   | <0.0001                   |
| IgG vs. D+P 15W | <0.0001                   |
| D vs. D+P 15W   | 0.3493                    |
| IgG vs. D 17W   | 0.0755                    |
| IgG vs. D+P 17W | <0.0001                   |
| D vs. D+P 17W   | <0.0001                   |
| MMTV-PyMT       |                           |
| IgG vs. D       | <0.0001                   |
| IgG vs. P       | 0.0009                    |
| IgG vs. D+P     | <0.0001                   |
| D vs. D+P       | 0.4011                    |
| P vs. D+P       | 0.0026                    |
| NFpp10-GBM      |                           |
| IgG vs. B       | <0.0001                   |
| IgG vs. P       | 0.0552                    |
| IgG vs. B+P     | <0.0001                   |
| B vs. B+P       | 0.8326                    |
| P vs. D+P       | 0.0061                    |

| Fig 5B          | % CD31 <sup>+</sup> NG2 <sup>+</sup> area |
|-----------------|-------------------------------------------|
| RT2-PNET        |                                           |
| IgG vs. D 15W   | <0.0001                                   |
| IgG vs. D+P 15W | <0.0001                                   |
| D vs. D+P 15W   | 0.0235                                    |
| IgG vs. D 17W   | <0.0001                                   |
| IgG vs. D+P 17W | <0.0001                                   |
| D vs. D+P 17W   | 0.0024                                    |
| MMTV-PyMT       |                                           |
| IgG vs. D       | 0.0235                                    |
| IgG vs. D+P     | <0.0001                                   |
| D vs. D+P       | 0.0012                                    |
| NFpp10-GBM      |                                           |
| IgG vs. B       | 0.9436                                    |
| IgG vs. B+P     | 0.0128                                    |
| B vs. B+P       | 0.0408                                    |

| Fig 5C      | % MECA79 <sup>+</sup> CD31 <sup>+</sup> vessels |
|-------------|-------------------------------------------------|
| RT2-PNET    |                                                 |
| IgG vs. D   | >0.9999                                         |
| IgG vs. P   | 0.0047                                          |
| IgG vs. D+P | 0.0006                                          |
| D vs. D+P   | 0.0006                                          |
| P vs. D+P   | 0.0023                                          |
| MMTV-PyMT   |                                                 |
| IgG vs. D   | 0.8048                                          |
| IgG vs. P   | 0.7104                                          |
| IgG vs. D+P | 0.0023                                          |
| D vs. D+P   | 0.0175                                          |
| P vs. D+P   | 0.0175                                          |
| NFpp10-GBM  |                                                 |
| IgG vs. B   | >0.9999                                         |
| IgG vs. P   | >0.9999                                         |
| IgG vs. B+P | 0.4615                                          |
| B vs. B+P   | 0.4615                                          |
| P vs. D+P   | 0.4615                                          |

| Fig 6A            | MMTV-PyMT | RT2-PNET |
|-------------------|-----------|----------|
| CD3 <sup>+</sup>  | <0.0001   | <0.0001  |
| CD8 <sup>+</sup>  | <0.0001   | <0.0001  |
| CD4 <sup>+</sup>  | <0.0001   | <0.0001  |
| B220 <sup>+</sup> | <0.0001   | <0.0001  |

| Fig 6C      | <i>Ccl19</i> | <i>Ccl21</i> | <i>Glycam1</i> | <i>Cx13</i> | <i>Ccl7</i> | <i>Il7</i> | <i>Light</i> |
|-------------|--------------|--------------|----------------|-------------|-------------|------------|--------------|
| MMTV-PyMT   |              |              |                |             |             |            |              |
| IgG vs. D   | 0.0286       | 0.3429       | 0.8            | 0.1333      | 0.2857      | >0.9999    | 0.2          |
| IgG vs. P   | 0.0286       | 0.3429       | >0.9999        | 0.6429      | 0.6857      | 0.4278     | 0.3429       |
| IgG vs. D+P | 0.0286       | 0.0286       | 0.1333         | 0.1333      | 0.0286      | 0.0007     | 0.0286       |
| D vs. D+P   | 0.0286       | 0.0286       | 0.2            | 0.0286      | 0.0286      | 0.0002     | 0.0286       |
| P vs. D+P   | 0.0286       | 0.0286       | 0.0095         | 0.0095      | 0.0286      | <0.0001    | 0.0286       |
| RT2-PNET    |              |              |                |             |             |            |              |
| IgG vs. D   | 0.3429       | >0.9999      | 0.6286         | 0.0286      | 0.8857      | >0.9999    | 0.6857       |
| IgG vs. P   | 0.0571       | 0.6857       | 0.8            | 0.4571      | 0.1143      | 0.3429     | 0.4857       |
| IgG vs. D+P | 0.0286       | 0.0286       | 0.0687         | 0.198       | 0.0286      | 0.3429     | 0.0286       |
| D vs. D+P   | 0.0286       | 0.0286       | 0.1091         | 0.2141      | 0.0286      | >0.9999    | 0.0286       |
| P vs. D+P   | 0.0286       | 0.0286       | 0.1091         | 0.2141      | 0.0286      | 0.2857     | 0.0286       |
| NFpp10-GBM  |              |              |                |             |             |            |              |
| IgG vs. B   | 0.4857       | 0.0571       | 0.4286         | 0.9048      | 0.2571      | 0.8857     | >0.9999      |
| IgG vs. P   | 0.0286       | 0.6857       | 0.4818         | 0.2788      | 0.5714      | 0.3429     | 0.6857       |
| IgG vs. B+P | 0.0286       | 0.0286       | >0.9999        | 0.9048      | 0.3143      | 0.8857     | 0.0286       |
| B vs. B+P   | 0.0286       | 0.0286       | 0.5887         | 0.9372      | >0.9999     | 0.6857     | 0.0286       |
| P vs. B+P   | 0.2          | 0.0286       | 0.607          | 0.8518      | 0.6857      | 0.4857     | 0.0286       |

| Fig 7B, C, D, E, F | HEV per tumor area | CD8 <sup>+</sup> per vessel | GzB <sup>+</sup> CD8 <sup>+</sup> /CD8 <sup>+</sup> | CC3 <sup>+</sup> area | Necrosis |
|--------------------|--------------------|-----------------------------|-----------------------------------------------------|-----------------------|----------|
| IgG vs. D+P        | 0.0002             | 0.0139                      | <0.0001                                             | <0.0001               | 0.0635   |
| IgG vs. D+P+Ag     | 0.0062             | <0.0001                     | <0.0001                                             | <0.0001               | 0.0159   |
| IgG vs. D+P+Ant    | 0.979              | <0.0001                     | <0.0001                                             | 0.9926                | 0.1143   |
| D+P vs. D+P+Ag     | 0.0932             | 0.0009                      | 0.0039                                              | 0.5866                | 0.0079   |
| D+P vs. D+P+Ant    | 0.0451             | 0.3589                      | 0.8977                                              | 0.0002                | 0.1905   |
| D+P+Ag vs. D+P+Ant | 0.0159             | 0.012                       | 0.0025                                              | <0.0001               | 0.0159   |



| Fig 7G         | Day 0   | Day 4   | Day 7  | Day 10 | Day 14  | Day 17 | Day 21 | Day 24 | Day 28  | Day 30 |
|----------------|---------|---------|--------|--------|---------|--------|--------|--------|---------|--------|
| IgG vs. D+P    | >0.9999 | 0.6857  | 0.1143 | 0.0286 | 0.0286  | 0.0571 | 0.0286 |        |         |        |
| IgG vs. D+P+Ag | 0.6857  | 0.4857  | 0.0286 | 0.0286 | 0.0571  | 0.0571 | 0.0286 |        |         |        |
| D+P vs. D+P+Ag | 0.8857  | >0.9999 | 0.3429 | 0.6857 | >0.9999 | 0.8857 | 0.8857 | 0.8857 | >0.9999 | 0.7    |

| Fig 7H         | % MECA79 <sup>+</sup> CD31 <sup>+</sup> vessels |
|----------------|-------------------------------------------------|
| B+P vs. B+P+Ag | 0.0008                                          |

| Fig 7I, J      | GzB <sup>+</sup> | Tumor burden |
|----------------|------------------|--------------|
| IgG vs. Ag     | 0.2              | 0.7          |
| IgG vs. B+P    | 0.8571           | 0.8571       |
| IgG vs. B+P+Ag | 0.0457           | 0.0571       |
| Ag vs. B+P     | 0.4              | 0.6286       |
| Ag vs. D+P+Ag  | 0.0571           | 0.0571       |
| D+P vs. D+P+Ag | 0.0286           | 0.0286       |

| fig S3     | B20S (50µg/ml) | IFN $\gamma$ (50 ng/ml) | Hypoxia (1% O <sub>2</sub> ) |
|------------|----------------|-------------------------|------------------------------|
| RT2-PNET   |                |                         |                              |
| 0 vs. 4    | 0.0012         | 0.0164                  | 0.0286                       |
| 0 vs. 8    | 0.2614         | 0.0002                  | 0.1333                       |
| 0 vs. 16   | 0.3054         | 0.0002                  | 0.1333                       |
| 0 vs. 24   | 0.8212         | 0.0002                  | 0.1333                       |
| 0 vs. 48   | 0.1186         | 0.0002                  | 0.0286                       |
| MMTV-PyMT  |                |                         |                              |
| 0 vs. 4    | 0.662          | 0.0183                  | 0.1508                       |
| 0 vs. 8    | 0.4857         | 0.0183                  | 0.254                        |
| 0 vs. 16   | 0.8589         | 0.0183                  | 0.0079                       |
| 0 vs. 24   | 0.7097         | 0.0007                  | 0.1508                       |
| 0 vs. 48   | 0.5707         | 0.0007                  | 0.0079                       |
| NFpp10-GBM |                |                         |                              |
| 0 vs. 4    | 0.8286         | 0.0095                  | 0.1508                       |
| 0 vs. 8    | 0.1457         | 0.0095                  | 0.6508                       |
| 0 vs. 16   | 0.6334         | 0.0095                  | 0.0159                       |
| 0 vs. 24   | 0.7134         | 0.0095                  | 0.2222                       |
| 0 vs. 48   | 0.237          | 0.0095                  | 0.6905                       |
| HcMEC/D3   |                |                         |                              |
| 0 vs. 4    | 0.3333         | 0.3333                  |                              |
| 0 vs. 8    | 0.6667         | 0.3333                  |                              |
| 0 vs. 16   | 0.6667         | 0.3333                  |                              |
| 0 vs. 24   | >0.9999        | 0.3333                  |                              |
| 0 vs. 48   | 0.6667         | 0.3333                  |                              |
| BMDC       |                |                         |                              |
| 0 vs. 4    | 0.0079         | 0.0079                  | 0.0317                       |
| 0 vs. 8    | 0.0079         | 0.0079                  | 0.0079                       |
| 0 vs. 16   | 0.0079         | 0.0079                  | 0.0079                       |
| 0 vs. 24   | 0.0079         | 0.0079                  | 0.0079                       |
| 0 vs. 48   | 0.0079         | 0.0079                  | 0.0079                       |

| fig S4 RT2-PNET | Trial 189 | Trial 196 |
|-----------------|-----------|-----------|
| IgG vs. D       | 0.0057    | 0.0022    |
| IgG vs. P       | 0.3185    | 0.1536    |
| IgG vs. D+P     | 0.0027    | 0.0004    |
| D vs. D+P       | 0.0022    | 0.0119    |

| fig S4 MMTV-PyMT | Day 0   | Day 2  | Day 5  | Day 8  | Day 11 | Day 14 |
|------------------|---------|--------|--------|--------|--------|--------|
| Trial 168        |         |        |        |        |        |        |
| IgG vs. D        | >0.9999 | 0.2251 | 0.0043 | 0.0022 | 0.0152 | 0.0087 |
| IgG vs. P        | 0.4848  | 0.1688 | 0.0087 | 0.0649 | 0.0152 | 0.026  |
| IgG vs. D+P      | 0.9697  | 0.6667 | 0.0022 | 0.0022 | 0.0022 | 0.0022 |
| D vs. D+P        | 0.974   | 0.4848 | 0.3095 | 0.026  | 0.0043 | 0.026  |
| P vs. D+P        | 0.2403  | 0.3095 | 0.4848 | 0.1320 | 0.0260 | 0.0260 |
| Trial 190        |         |        |        |        |        |        |
| IgG vs. D        | 0.7302  | 0.7302 | 0.1111 | 0.0159 | 0.0159 | 0.0317 |
| IgG vs. P        | 0.4857  | 0.2    | 0.0571 | 0.0286 | 0.0286 | 0.0286 |
| IgG vs. D+P      | 0.4127  | 0.0635 | 0.0159 | 0.0159 | 0.0159 | 0.0159 |
| D vs. D+P        | 0.5476  | 0.3095 | 0.0238 | 0.0556 | 0.0317 | 0.0079 |
| P vs. D+P        | 0.7302  | 0.7302 | 0.4127 | 0.1111 | 0.1111 | 0.0635 |

| fig S4 NFpp10-GBM | Trial 148 | Trial 156 |
|-------------------|-----------|-----------|
| IgG vs. B         | 0.1993    | 0.771     |
| IgG vs. P         | 0.5217    | 0.4152    |
| IgG vs. B+P       | 0.0194    | 0.103     |
| B vs. B+P         | 0.3968    | 0.1313    |
| P vs. B+P         | 0.1150    | 0.0969    |

| fig S5A     | <i>Tnf-α</i> | <i>Il12</i> | <i>Il23</i> | <i>Ccl11</i> | <i>Tgf-β</i> | <i>Il10</i> | <i>Il6</i> | <i>Ccl17</i> |
|-------------|--------------|-------------|-------------|--------------|--------------|-------------|------------|--------------|
| RT2-PNET    |              |             |             |              |              |             |            |              |
| IgG vs. D   | 0.125        | 0.125       | 0.0357      | 0.0357       | 0.8          | 0.1333      | 0.1333     | >0.9999      |
| IgG vs. P   | 0.2143       | 0.2143      | 0.125       | 0.2143       | >0.9999      | 0.1333      | >0.9999    | 0.1333       |
| IgG vs. D+P | 0.0364       | 0.0364      | 0.0364      | 0.0364       | 0.0444       | 0.0444      | 0.0444     | 0.8889       |
| D vs. D+P   | 0.012        | 0.0599      | 0.1119      | 0.019        | 0.0081       | 0.8081      | 0.004      | 0.5697       |
| P vs. D+P   | 0.012        | 0.1898      | 0.1898      | 0.019        | 0.004        | 0.0162      | 0.004      | 0.004        |
| MMTV-PyMT   |              |             |             |              |              |             |            |              |
| IgG vs. D   | 0.3556       | 0.1798      | 0.2887      | >0.9999      | 0.8172       | 0.0999      | 0.5195     | 0.022        |
| IgG vs. P   | 0.1798       | 0.1339      | 0.5195      | 0.023        | 0.1768       | 0.3576      | 0.5205     | 0.0719       |
| IgG vs. D+P | 0.8142       | 0.0709      | 0.013       | 0.013        | 0.0709       | 0.7103      | 0.7103     | 0.0719       |
| D vs. D+P   | 0.2886       | 0.3054      | 0.0005      | 0.0003       | 0.2176       | 0.2176      | 0.9705     | 0.2248       |
| P vs. D+P   | 0.0654       | 0.7245      | 0.0003      | 0.404        | 0.0068       | 0.6434      | 0.9859     | 0.8126       |
| NFpp10-GBM  |              |             |             |              |              |             |            |              |
| IgG vs. B   | 0.7459       | 0.0373      | 0.1215      | 0.018        | 0.012        | 0.2421      | 0.2601     | 0.0028       |
| IgG vs. P   | 0.8923       | 0.305       | 0.4357      | 0.537        | 0.9556       | 0.9555      | 0.0441     | >0.9999      |
| IgG vs. B+P | 0.8362       | 0.2674      | 0.355       | 0.6583       | 0.3553       | 0.4199      | 0.2601     | 0.2601       |
| B vs. B+P   | 0.4359       | 0.0783      | 0.0355      | 0.0524       | 0.063        | 0.2101      | 0.4894     | 0.2581       |
| P vs. B+P   | 0.776        | 0.776       | 0.5169      | 0.8564       | 0.2625       | 0.5774      | 0.9131     | 0.2325       |

| fig S5B         | IFN $\gamma$ <sup>+</sup><br>% CD3 <sup>+</sup> CD4 <sup>+</sup> | IFN $\gamma$ <sup>+</sup><br>% CD3 <sup>+</sup> CD8 <sup>+</sup> |
|-----------------|------------------------------------------------------------------|------------------------------------------------------------------|
| RT2-PNET        |                                                                  |                                                                  |
| IgG vs. D 15W   | 0.0022                                                           | 0.026                                                            |
| IgG vs. P 15W   | 0.0022                                                           | 0.0043                                                           |
| IgG vs. D+P 15W | 0.1014                                                           | 0.0022                                                           |
| D vs. D+P 15W   | 0.4452                                                           | 0.6688                                                           |
| P vs. D+P 15W   | 0.9452                                                           | 0.2987                                                           |
| IgG vs. D 17W   | 0.9048                                                           | 0.8452                                                           |
| IgG vs. D+P 17W | 0.0022                                                           | 0.0087                                                           |
| D vs. D+P 17W   | 0.0476                                                           | 0.0357                                                           |
| MMTV-PyMT       |                                                                  |                                                                  |
| IgG vs. D       | 0.026                                                            | 0.0519                                                           |
| IgG vs. P       | 0.366                                                            | 0.1111                                                           |
| IgG vs. D+P     | 0.0411                                                           | 0.0043                                                           |
| D vs. D+P       | 0.3939                                                           | 0.3939                                                           |
| P vs. D+P       | 0.1375                                                           | 0.0095                                                           |
| NFpp10-GBM      |                                                                  |                                                                  |
| IgG vs. B       | 0.6991                                                           | 0.0262                                                           |
| IgG vs. P       | 0.4848                                                           | 0.3176                                                           |
| IgG vs. B+P     | 0.9372                                                           | 0.1282                                                           |
| B vs. B+P       | 0.9372                                                           | 0.1649                                                           |
| P vs. D+P       | 0.9372                                                           | 0.9015                                                           |

| fig S6      | <i>Vegf</i> | <i>bFgf</i> | <i>Mmp9</i> | <i>Il8</i> | <i>Cxcl4</i> | <i>Cxcl14</i> | <i>Cxcl9</i> | <i>Cxcl10</i> |
|-------------|-------------|-------------|-------------|------------|--------------|---------------|--------------|---------------|
| RT2-PNET    |             |             |             |            |              |               |              |               |
| IgG vs. D   | 0.1333      | 0.2667      | 0.1333      | 0.1333     | 0.1333       | 0.1333        | 0.2667       | 0.1333        |
| IgG vs. P   | 0.8         | 0.1333      | 0.1333      | 0.1333     | 0.1333       | 0.1333        | 0.2667       | 0.1333        |
| IgG vs. D+P | 0.0444      | 0.8889      | 0.4         | >0.9999    | 0.0444       | 0.0444        | 0.1778       | 0.0444        |
| D vs. D+P   | 0.004       | >0.9999     | 0.5697      | 0.004      | 0.3677       | 0.2141        | 0.5697       | 0.004         |
| P vs. D+P   | 0.004       | 0.0162      | 0.2828      | 0.2141     | 0.0081       | 0.4606        | 0.6          | 0.2141        |
| MMTV-PyMT   |             |             |             |            |              |               |              |               |
| IgG vs. D   | 0.0091      | 0.4818      | 0.7105      | 0.4818     | 0.8636       | 0.2818        | 0.0091       | 0.4818        |
| IgG vs. P   | 0.0182      | 0.0091      | 0.3301      | 0.2818     | 0.0091       | 0.6           | 0.0091       | 0.0091        |
| IgG vs. D+P | 0.0091      | 0.0091      | 0.5035      | 0.0091     | 0.0091       | 0.1           | 0.0091       | 0.0091        |
| D vs. D+P   | 0.0014      | 0.1135      | 0.8167      | 0.0005     | 0.0003       | 0.8633        | 0.1903       | 0.0005        |
| P vs. D+P   | 0.1615      | 0.0003      | 0.5457      | 0.0005     | 0.9314       | 0.9314        | 0.6665       | 0.4363        |
| NFpp10-GBM  |             |             |             |            |              |               |              |               |
| IgG vs. B   | 0.0336      | 0.3301      | 0.9399      | 0.6042     | 0.6042       | 0.0503        | 0.1063       | 0.0196        |
| IgG vs. P   | 0.0036      | 0.0005      | 0.0036      | 0.0093     | 0.0366       | 0.2621        | 0.0366       | 0.001         |
| IgG vs. B+P | 0.3483      | >0.9999     | 0.414       | 0.0336     | 0.9399       | 0.9399        | 0.3301       | 0.0056        |
| B vs. B+P   | 0.0625      | 0.077       | 0.1359      | 0.0188     | 0.9314       | 0.6048        | 0.2581       | 0.3401        |
| P vs. B+P   | 0.0007      | <0.0001     | 0.0027      | 0.7259     | 0.0732       | 0.482         | 0.0297       | 0.8038        |

| fig S7A                         | Copies <i>Ltβr</i> /<br>100 copies <i>Gapdh</i> |
|---------------------------------|-------------------------------------------------|
| β-TC3 (RT2-PNET) vs. MMTV-PyMT  | 0.3333                                          |
| β-TC3 (RT2-PNET) vs. NFpp10-GBM | 0.3333                                          |
| MMTV-PyMT vs. NFpp10-GBM        | 0.6667                                          |

| fig S7B                 | Cell death | Proliferation |
|-------------------------|------------|---------------|
| $\beta$ -TC3 (RT2-PNET) |            |               |
| 0 vs. 100 ng/ml Ag      | 0.2944     | 0.0411        |
| 0 vs. 300 ng/ml Ag      | 0.7619     | 0.0411        |
| 0 vs. 100 ng/ml Ant     | 0.9654     | 0.2403        |
| 0 vs. 300 ng/ml Ant     | 0.9113     | 0.8182        |
| MMTV-PyMT               |            |               |
| 0 vs. 100 ng/ml Ag      | 0.4567     | 0.9372        |
| 0 vs. 300 ng/ml Ag      | 0.513      | 0.5887        |
| 0 vs. 100 ng/ml Ant     | 0.3766     | 0.9372        |
| 0 vs. 300 ng/ml Ant     | 0.4221     | 0.9372        |
| NFpp10-GBM              |            |               |
| 0 vs. 100 ng/ml Ag      | 0.1905     | 0.0043        |
| 0 vs. 300 ng/ml Ag      | 0.0563     | 0.0022        |
| 0 vs. 100 ng/ml Ant     | 0.1558     | 0.6991        |
| 0 vs. 300 ng/ml Ant     | 0.7143     | 0.3095        |

| fig S8A, B, C, F, G | Tumor burden | HEV per tumor area | CD8+ per vessel | CD3+ per HEV | CD8+ per HEV |
|---------------------|--------------|--------------------|-----------------|--------------|--------------|
| IgG vs. D+P         | 0.329        | 0.1667             | 0.1128          | 0.5368       | 0.1429       |
| IgG vs. D+P+Ag      | 0.5368       | 0.1429             | <0.0001         | 0.2468       | >0.9999      |
| IgG vs. D+P+Ant     | 0.2468       | >0.9999            | 0.5532          | 0.5476       | 0.1825       |
| D+P vs. D+P+Ag      | 0.5476       | 0.1825             | 0.0213          | >0.9999      | 0.5532       |
| D+P vs. D+P+Ant     | 0.8413       | 0.2857             | 0.4418          | 0.1825       | 0.0213       |
| D+P+Ag vs. D+P+Ant  | 0.8413       | 0.1429             | 0.0008          | 0.0213       | 0.0286       |

| fig S8D            | RT2-PNET<br>HEV per tumor area | MMTV-PyMT<br>HEV per tumor area |
|--------------------|--------------------------------|---------------------------------|
| IgG vs. D+P        | 0.1667                         | 0.0002                          |
| IgG vs. D+P+Ag     | 0.1429                         | 0.0062                          |
| IgG vs. D+P+Ant    | >0.9999                        | 0.979                           |
| IgG vs. Ag         | 0.0286                         | 0.9333                          |
| IgG vs. Ant        | >0.9999                        | 0.2                             |
| D+P vs. D+P+Ag     | 0.1825                         | 0.0932                          |
| D+P vs. D+P+Ant    | 0.2857                         | 0.0451                          |
| D+P vs. Ag         | 0.2321                         | 0.0444                          |
| D+P vs. Ant        | 0.2857                         | 0.0444                          |
| D+P+Ag vs. D+P+Ant | 0.1429                         | 0.0159                          |
| D+P+Ag vs. Ag      | 0.4                            | 0.1905                          |
| D+P+Ant vs. Ant    | >0.9999                        | 0.2381                          |
